# Supplementary material for: Low-temperature transformation of mechanochemically treated oyster shells into nanocrystalline apatites
Source: Royal Society of Chemistry journal article supplement (doi:10.1039/d5su00830a), 2025-12-12
Supplement: d5su00830a1.pdf [file d5su00830a1.pdf]

## SUPPLEMENTARY INFORMATION

### Low-temperature transformation of mechanochemically treated oyster shells into nanocrystalline apatites

Carla Triunfo<sup>a</sup>, Francesca Oltolina<sup>b</sup>, Annarita D'Urso<sup>b</sup>, Raquel Fernández-Penas<sup>c</sup>,  
Giuseppe Falini<sup>a</sup>, Antonia Follenzi<sup>b</sup>, Jaime Gómez-Morales<sup>c\*</sup>

<sup>a</sup>*Department of Chemistry "Giacomo Ciamician", University of Bologna, via P. Gobetti 85, 40129 Bologna (Italy).*

<sup>b</sup>*Dipartimento di Scienze della Salute, Università del Piemonte Orientale, "A. Avogadro" Via Solaroli 17, 28100 Novara (Italy).*

<sup>c</sup>*Laboratorio de Estudios Cristalográficos, IACT-CSIC, Avda. Las Palmeras, nº 4, 18100 Armilla (Spain).*

\*Corresponding author: [jaime.gomez@csic.es](mailto:jaime.gomez@csic.es) (J.G.-M.)

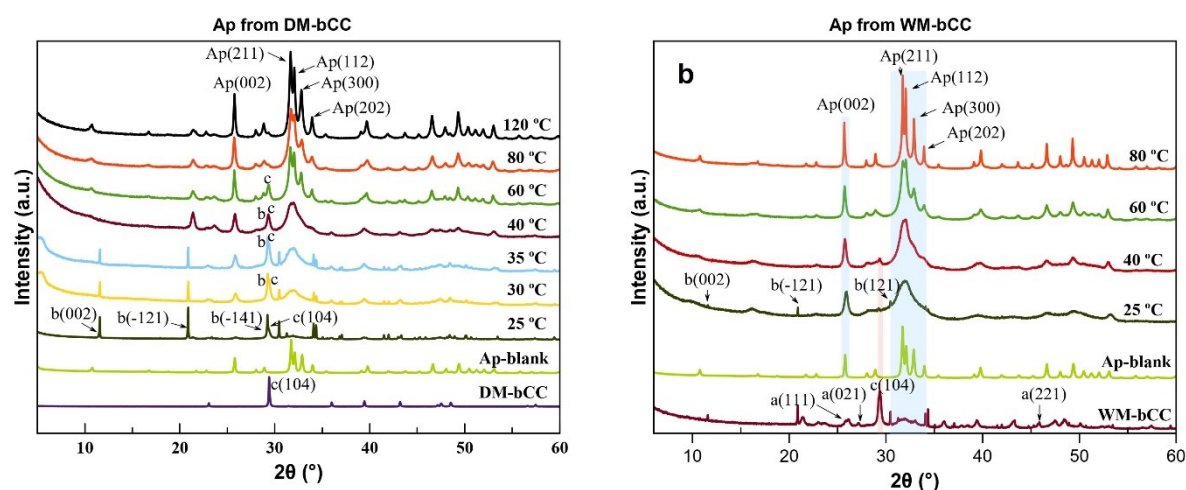

**Figure S1.** XRD patterns showing the evolution of the transformation of (a) dry-milled bCC (DM-bCC) samples into calcium phosphates at temperatures between 25 °C and 120 °C and (b) of the wet-milled bCC (WM-bCC) samples into calcium phosphates within the temperature range from 25 °C to 80 °C. Ap, b, and c denote apatite, brushite, and calcite, respectively. The Miller indices of the principal reflections are listed after the symbol of each mineral phase.

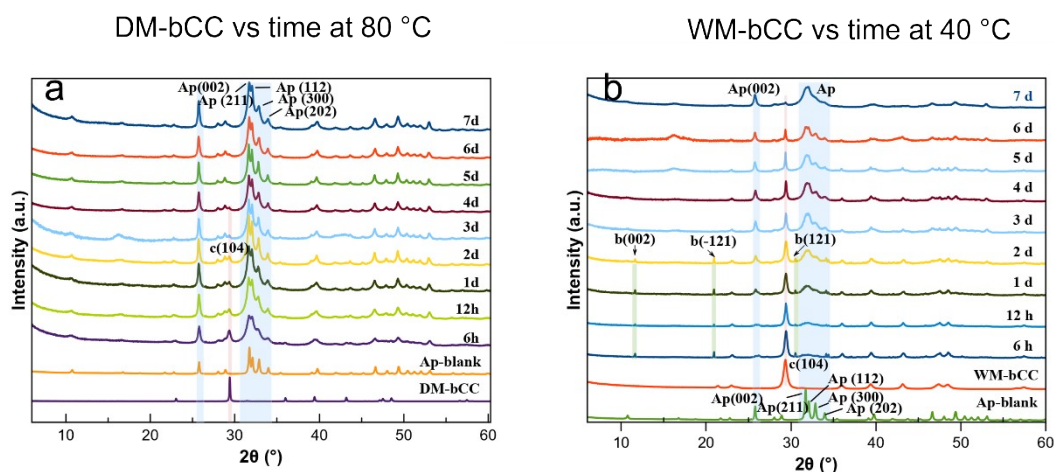

**Figure S2.** XRD patterns showing the evolution of the transformation of (a) dry-milled bCC (DM-bCC) samples at 80 °C and (b) of the wet-milled bCC (WM-bCC) samples at 40 °C into calcium phosphates in the time range from 6 h to 7 days. Ap, b, and c denote apatite, brushite, and calcite, respectively. The Miller indices of the principal reflections are listed after the symbol of each mineral phase.
